# Supplementary material
Source: PubMed Central journal article supplement (PMC7964291)
Supplement: 15-00218.pdf [file 15-00218.pdf]

**On-line Table: ROIs were hand-drawn around the region of maximum intensity<sup>a</sup>**

| Patient No. | Area ROI (mm <sup>2</sup> ) | ASL ROI | ASL Contralat | Ratio ROI/Contralat | ASL Interpretation |
|-------------|-----------------------------|---------|---------------|---------------------|--------------------|
| 1           | 854                         | 44.3    | 43            | 1                   | Negative           |
| 2           | 570                         | 675.7   | 366.7         | 1.6                 | Positive           |
| 3           | 722                         | 52      | 56            | 0.9                 | Negative           |
| 4           | 535                         | 571.3   | 368           | 1.6                 | Positive           |
| 5           | 842                         | 558.7   | 235.7         | 2.4                 | Positive           |
| 6           | 614                         | 435     | 321           | 1.4                 | Positive           |
| 7           | 820                         | 49.7    | 47.3          | 1                   | Negative           |
| 8           | 743                         | 36      | 34.7          | 1                   | Negative           |
| 9           | 546                         | 68.3    | 61.3          | 1.1                 | Negative           |
| 10          | 493                         | 109     | 99.3          | 1.1                 | Negative           |
| 11          | 725                         | 248     | 128.3         | 1.9                 | Positive           |
| 12          | 496                         | 21      | 23.7          | 0.9                 | Negative           |
| 13          | 557                         | 352.3   | 266.3         | 1.3                 | Negative           |
| 14          | 842                         | 309     | 288.3         | 1.1                 | Negative           |

**Note:**—Contralat indicates contralateral.

<sup>a</sup> The average of values within this ROI was normalized to a contralateral region of the same volume. The area of the ROI drawn around the region of lesion is listed as "Area ROI". The mean ASL signal in the region of the lesion is listed as "ASL ROI". The mean ASL signal in the analogous region contralateral to the lesion is listed as "ASL Contralat." The ratio of "ASL ROI" to "ASL Contralat" is also listed and compared with the qualitative reading by the neuroradiologist.
